# Supplementary material for: On the nature of optical activity in chiral transition metal complexes: [Pd(Me)2(BINAP)]
Source: Royal Society of Chemistry journal article supplement (doi:10.1039/d3nj00945a), 2023-01-01
Supplement: d3nj00945a1.pdf [file d3nj00945a1.pdf]

## On the nature of optical activity in chiral transition metal complexes: [Pd(Me)<sub>2</sub>(BINAP)] Supporting Information

Natalie Fehn,<sup>†</sup> Melanie Strauss,<sup>†</sup> Christian Jandl, Markus Drees, Ueli Heiz, Klaus Köhler, and Aras Kartouzian\*

Department of Chemistry and Catalysis Research Centre, TUM School of Natural Sciences, Technical University of Munich, Lichtenbergstr. 4, 85748 Garching bei München, Germany.

<sup>†</sup> NF and MS contributed equally to this work.

\* Corresponding author: aras.kartouzian@mytum.de

### Experimental Details

#### General

All procedures with water and air sensitive substrates were conducted under argon atmosphere (Schlenk, Glovebox). Chemicals were purchased from Sigma Aldrich. [PdCl<sub>2</sub>(BINAP)] was synthesized according to literature procedure.<sup>[1,2]</sup> Solvents were dried over molecular sieve Å4 and degassed via freeze pumping, afterwards stored under argon atmosphere. The liquid state <sup>1</sup>H-NMR and <sup>31</sup>P-NMR spectra were recorded on a 400 MHz Bruker Advance DRX400 spectrometer. Samples were dissolved in 0.4 mL of benzene-d<sub>6</sub> inside standard NMR tubes. All chemical shifts are given in δ-values (ppm). <sup>1</sup>H-NMR spectra of complexes were calibrated to the solvent signal benzene: 7.16 ppm. UV-VIS and CD spectroscopy were measured at room temperature on a J-815 spectrometer (Jasco) with 50 nm/min with two to three repetitions. Sample concentrations were 0.13 mg/mL for [Pd(Me)<sub>2</sub>(R/S-BINAP)]. The toluene solutions were placed into 1 mm quartz capillaries. The IR spectra were collected on a Bruker FT-IR spectrometer inside an argon-purged glove box with an attenuated total reflectance (ATR) setup.

#### PdMe<sub>2</sub>(BINAP) – (2,2'-Bis(diphenylphosphino)-1,1'-binaphthyl)dimethylpalladium (II)

As the complexes were not described in the literature yet, we synthesized and structurally characterized the complexes (both enantiomers) for the first time. It was found that the PdMe<sub>2</sub>(BINAP) complex decomposes easily to the more stable Pd<sup>0</sup>(BINAP)<sub>2</sub> depending on synthesis route and reaction conditions. Finally, we decided for the synthesis pathway attaching the BINAP ligands directly to PdCl<sub>2</sub>(CH<sub>3</sub>CN)<sub>2</sub> by substitution of acetonitrile.<sup>[1,2]</sup> The PdCl<sub>2</sub>(BINAP) complex was subsequently methylated with methyl lithium resulting in PdMe<sub>2</sub>(BINAP) (Scheme S1). The final complex PdMe<sub>2</sub>(BINAP) was obtained with good purity for the S- and R-BINAP ligands with a yield of 36 %. After purification and re-crystallization, single crystals of PdMe<sub>2</sub>(S-BINAP) could be grown and isolated from the colourless solution and the structure of the complex was confirmed by X-ray diffraction (SC-XRD).

Scheme S1: Synthesis pathway from palladium chloride to PdMe<sub>2</sub>(BINAP) (BINAP = 2,2'-Bis(diphenylphosphino)-1,1'-binaphthyl) applied for both enantiomers R and S.

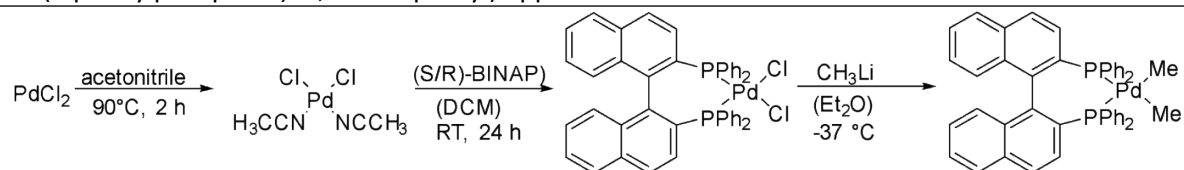

To a -35 °C cold solution of PdCl<sub>2</sub>(BINAP) (244 mg, 0.11 mmol) in diethyl ether (8 mL) a 1.6 M solution of methyl lithium (0.6 mL, 9.4 mmol) was added dropwise under continuous stirring. The reaction solution was kept at -5 °C until the complete discoloration of the solution could be observed. Afterwards, 5 mL of water was added to the reaction mixture, before it was cooled to -40 °C. The organic layer was separated and dried over MgSO<sub>4</sub>. The rest of the solvent was removed under vacuo,

so a light-pink solid was obtained. The solid was solved in 16 mL diethyl ether and stirred for one hour, then 18 mL pentane was added slowly to the solution and kept in the freezer overnight. A colourless precipitate was obtained, which was filtered and dried under vacuo. 85 mg (0.11 mmol, 36 % yield) of PdMe<sub>2</sub>(R-BINAP) or PdMe<sub>2</sub>(S-BINAP) was obtained and stored at -37 °C.

<sup>1</sup>H-NMR (400 MHz, C<sub>6</sub>D<sub>6</sub>, 300 K) δ (ppm) = 1.10 (s, 6H, Pd(CH<sub>3</sub>)<sub>2</sub>), 6.34-6.42 (t, 4H, naphthyl-CH), 6.45-6.51 (m, 2H, PPh<sub>2</sub>), 6.63-6.69 (m, 4H, PPh<sub>2</sub>), 6.92-7.25 (m, 12H, PPh<sub>2</sub>), 7.48-7.759 (m, 6H, naphthyl-CH, PPh<sub>2</sub>), 7.89-7.97 (m, 4H, naphthyl-CH).

<sup>31</sup>P-NMR (400 MHz, C<sub>6</sub>D<sub>6</sub>, 300 K) δ (ppm) = 23.43 (s, 2P, 2P-BINAP).

CD: 300-334 nm, 334-433 nm.

UV-VIS: 300-400 nm.

IR: 3100 cm<sup>-1</sup> (Ph-H-stretch). 3000 cm<sup>-1</sup> (Me-H-stretch), 2900 cm<sup>-1</sup> (Me-H-stretch), 700 cm<sup>-1</sup> (P-Pd-P-bend).

### *X-ray Crystallographic Details*

Single crystals of PdMe<sub>2</sub>(R/S-BINAP) were grown from a toluene solution by slow evaporation and simultaneous diffusion of pentane into it under an argon atmosphere. Data were collected on a single crystal X-ray diffractometer equipped with a CCD detector (Bruker APEX II, κ-CCD), a fine-focus sealed tube with MoK<sub>α</sub> radiation (λ = 0.71073 Å) and a Triumph monochromator using the APEX2 software package (PdMe<sub>2</sub>(S-BINAP)) or a CMOS detector (Bruker Photon-100), a TXS rotating anode with MoK<sub>α</sub> radiation and a Helios optic using the APEX3 software package (PdMe<sub>2</sub>(R-BINAP)).<sup>[3]</sup> The measurements were performed on single crystals coated with perfluorinated ether. The crystals were fixed on top of a kapton micro sampler and frozen under a stream of cold nitrogen. A matrix scan was used to determine the initial lattice parameters. Reflections were corrected for Lorentz and polarisation effects, scan speed, and background using SAINT.<sup>[4]</sup> Absorption correction, including odd and even ordered spherical harmonics was performed using SADABS.<sup>[4]</sup> Space group assignment was based upon systematic absences, E statistics, and successful refinement of the structure. The structures were solved using SHELXT with the aid of successive difference Fourier maps, and were refined against all data using SHELXL in conjunction with SHELXLE.<sup>[5,6]</sup> Hydrogen atoms were calculated in ideal positions as follows: Methyl hydrogen atoms were refined as part of rigid rotating groups, with a C–H distance of 0.98 Å and U<sub>iso</sub>(H) = 1.5·U<sub>eq</sub>(C). Non-methyl H atoms were placed in calculated positions and refined using a riding model with methylene, aromatic, and other C–H distances of 0.99 Å, 0.95 Å and 1.00 Å, respectively, and U<sub>iso</sub>(H) = 1.2·U<sub>eq</sub>(C). Non-hydrogen atoms were refined with anisotropic displacement parameters. Full-matrix least-squares refinements were carried out by minimizing Σw(F<sub>o</sub><sup>2</sup> - F<sub>c</sub><sup>2</sup>)<sup>2</sup> with the SHELXL weighting scheme.<sup>[5]</sup> Neutral atom scattering factors for all atoms and anomalous dispersion corrections for the non-hydrogen atoms were taken from *International Tables for Crystallography*.<sup>[7]</sup> Images of the crystal structure were generated with PLATON.<sup>[8]</sup> CCDC 2221766-2221767 contain the supplementary crystallographic data for this paper. These data are provided free of charge by the joint Cambridge Crystallographic Data Centre and Fachinformationszentrum Karlsruhe Access Structures service [www.ccdc.cam.ac.uk/structures](http://www.ccdc.cam.ac.uk/structures).

Crystallographic Data PdMe<sub>2</sub>(S-BINAP) (CCDC 2221766)

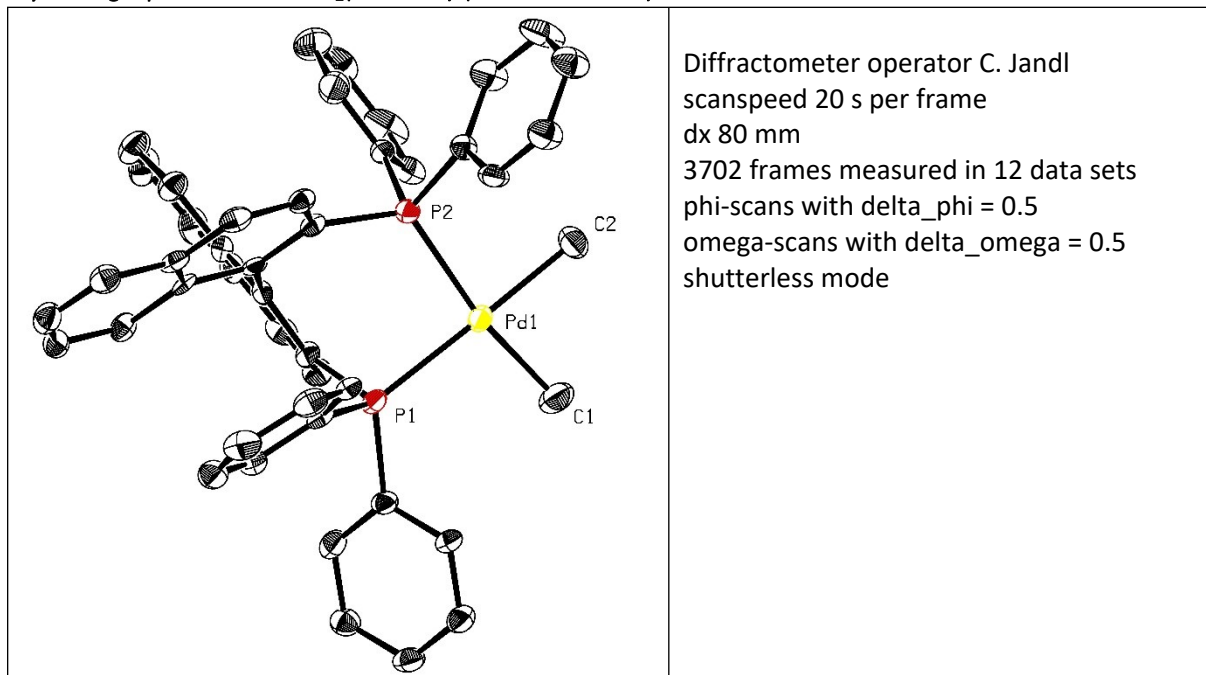

Table S1: Crystal Data PdMe<sub>2</sub>(S-BINAP)

|                                                    |                                                |
|----------------------------------------------------|------------------------------------------------|
| <u>C<sub>46</sub>H<sub>38</sub>P<sub>2</sub>Pd</u> |                                                |
| <u>M<sub>r</sub> = 759.10</u>                      | <u>D<sub>x</sub> = 1.413 Mg m<sup>-3</sup></u> |
| <u>Monoclinic, P2<sub>1</sub></u>                  | <u>Melting point: ? K</u>                      |
| <u>Hall symbol: P 2yb</u>                          | <u>Mo Kα radiation, λ = 0.71073 Å</u>          |
| <u>a = 11.949 (4) Å</u>                            | <u>Cell parameters from 3674 reflections</u>   |
| <u>b = 11.507 (4) Å</u>                            | <u>θ = 2.5–23.7°</u>                           |
| <u>c = 13.750 (4) Å</u>                            | <u>μ = 0.64 mm<sup>-1</sup></u>                |
| <u>β = 109.32 (2)°</u>                             | <u>T = 100 K</u>                               |
| <u>V = 1784.1 (10) Å<sup>3</sup></u>               | <u>Fragment, colourless</u>                    |
| <u>Z = 2</u>                                       | <u>0.19 × 0.11 × 0.08 mm</u>                   |
| <u>F(000) = 780</u>                                |                                                |

Table S2: Data Collection PdMe<sub>2</sub>(S-BINAP)

|                                                         |                                                        |
|---------------------------------------------------------|--------------------------------------------------------|
| <u>Radiation source: fine-focus sealed tube</u>         | <u>5277 reflections with I &gt; 2σ(I)</u>              |
| <u>Triumph monochromator</u>                            | <u>R<sub>int</sub> = 0.055</u>                         |
| <u>Detector resolution: 16 pixels mm<sup>-1</sup></u>   | <u>θ<sub>max</sub> = 25.4°, θ<sub>min</sub> = 2.0°</u> |
| <u>phi- and ω-rotation scans</u>                        | <u>h = -14 14</u>                                      |
| <u>Absorption correction: multi-scan</u>                | <u>k = -13 13</u>                                      |
| <u>SADABS 2016/2, Bruker</u>                            |                                                        |
| <u>T<sub>min</sub> = 0.615, T<sub>max</sub> = 0.745</u> | <u>l = -16 16</u>                                      |
| <u>15060 measured reflections</u>                       |                                                        |

Table S3: Refinement PdMe<sub>2</sub>(S-BINAP)

|                                                        |                                                                                                                    |
|--------------------------------------------------------|--------------------------------------------------------------------------------------------------------------------|
| <u>Refinement on F<sup>2</sup></u>                     | <u>Hydrogen site location: inferred from neighbouring sites</u>                                                    |
| <u>Least-squares matrix: full</u>                      | <u>H-atom parameters constrained</u>                                                                               |
| <u>R[F<sup>2</sup> &gt; 2σ(F<sup>2</sup>)] = 0.036</u> | <u>W = 1/[Σ<sup>2</sup>(FO<sup>2</sup>) + (0.023P)<sup>2</sup>] WHERE P = (FO<sup>2</sup> + 2FC<sup>2</sup>)/3</u> |

|                                          |                                                        |
|------------------------------------------|--------------------------------------------------------|
| $wR(F^2) = 0.069$                        | $(\Delta/\sigma)_{\max} = 0.001$                       |
| $S = 0.99$                               | $\Delta\rho_{\max} = 0.48 \text{ e } \text{\AA}^{-3}$  |
| 6131 reflections                         | $\Delta\rho_{\min} = -0.52 \text{ e } \text{\AA}^{-3}$ |
| 444 parameters                           | Extinction correction: none                            |
| 1 restraint                              | Extinction coefficient: -                              |
| 0 constraints                            | Absolute structure: Flack, Parsons <sup>[9,10]</sup>   |
| Primary atom site location: iterative    | Absolute structure parameter: 0.02 (2)                 |
| Secondary atom site location: difference |                                                        |
| Fourier map                              |                                                        |

Crystallographic Data PdMe<sub>2</sub>(R-BINAP) (CCDC 2221767)

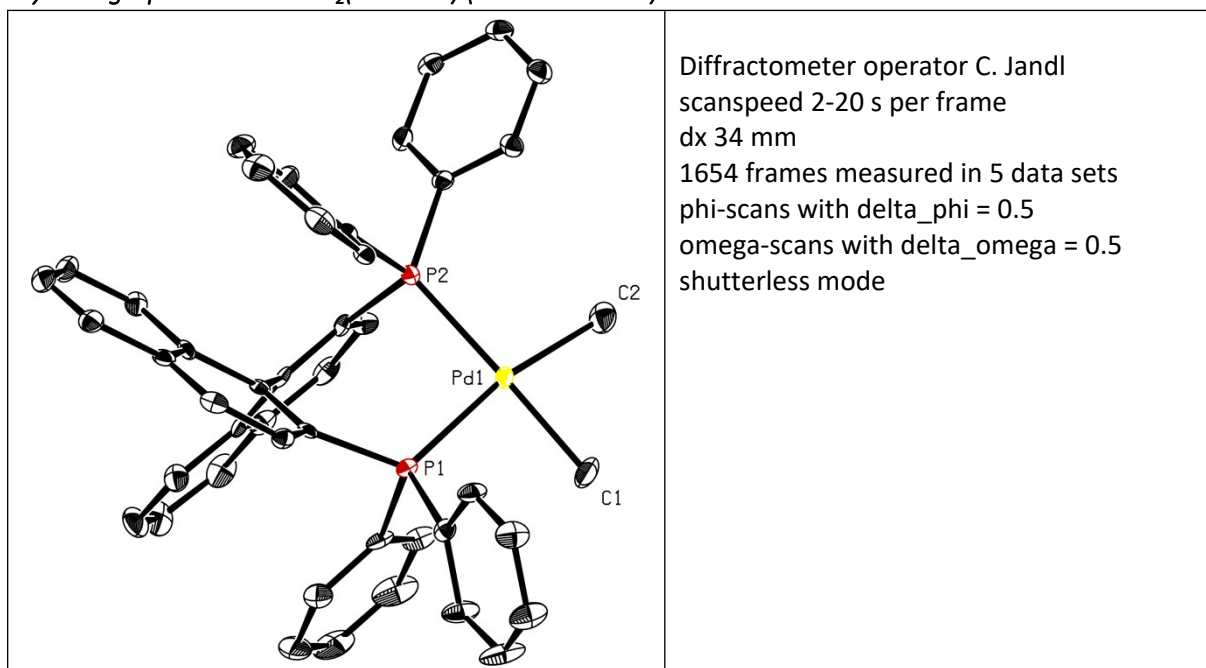

Table S4: Crystal Data PdMe<sub>2</sub>(R-BINAP)

|                                  |                                                         |
|----------------------------------|---------------------------------------------------------|
| $C_{46}H_{38}P_2Pd$              |                                                         |
| $M_r = 759.10$                   | $D_x = 1.417 \text{ Mg m}^{-3}$                         |
| Monoclinic, $P2_1$               | Melting point: ? K                                      |
| Hall symbol: $P 2_1 yb$          | Mo $K\alpha$ radiation, $\lambda = 0.71073 \text{ \AA}$ |
| $a = 11.8884 (6) \text{ \AA}$    | Cell parameters from 9935 reflections                   |
| $b = 11.4981 (5) \text{ \AA}$    | $\theta = 2.4\text{--}25.7^\circ$                       |
| $c = 13.7715 (7) \text{ \AA}$    | $\mu = 0.65 \text{ mm}^{-1}$                            |
| $\beta = 109.110 (2)^\circ$      | $T = 103 \text{ K}$                                     |
| $V = 1778.74 (15) \text{ \AA}^3$ | Fragment, colourless                                    |
| $Z = 2$                          | $0.29 \times 0.05 \times 0.02 \text{ mm}$               |
| $F(000) = 780$                   |                                                         |

Table S5: Data Collection PdMe<sub>2</sub>(R-BINAP)

|                                                 |                                                            |
|-------------------------------------------------|------------------------------------------------------------|
| Bruker Photon CMOS diffractometer               | 6493 independent reflections                               |
| Radiation source: TXS rotating anode            | 5995 reflections with $I > 2\sigma(I)$                     |
| Helios optic monochromator                      | $R_{\text{int}} = 0.068$                                   |
| Detector resolution: 16 pixels $\text{mm}^{-1}$ | $\theta_{\max} = 25.4^\circ$ , $\theta_{\min} = 2.4^\circ$ |

|                                                                 |                                 |
|-----------------------------------------------------------------|---------------------------------|
| <u>phi- and <math>\omega</math>-rotation scans</u>              | $h = \underline{-14}$ <u>14</u> |
| Absorption correction: <u>multi-scan</u>                        | $k = \underline{-13}$ <u>13</u> |
| <u>SADABS 2016/2, Bruker</u>                                    |                                 |
| $T_{\min} = \underline{0.679}$ , $T_{\max} = \underline{0.745}$ | $l = \underline{-16}$ <u>16</u> |
| <u>39950</u> measured reflections                               |                                 |

| Table S6: Refinement PdMe <sub>2</sub> (R-BINAP) |                                                                                  |
|--------------------------------------------------|----------------------------------------------------------------------------------|
| Refinement on $F^2$                              | Hydrogen site location: <u>inferred from neighbouring sites</u>                  |
| Least-squares matrix: <u>full</u>                | H-atom parameters constrained                                                    |
| $R[F^2 > 2\sigma(F^2)] = \underline{0.027}$      | $W = 1/[\Sigma^2(FO^2) + (0.0201P)^2 + 0.5977P]$ WHERE<br>$P = (FO^2 + 2FC^2)/3$ |
| $wR(F^2) = \underline{0.053}$                    | $(\Delta/\sigma)_{\max} = \underline{0.001}$                                     |
| $S = \underline{1.05}$                           | $\Delta\rho_{\max} = \underline{0.26} \text{ e } \text{Å}^{-3}$                  |
| <u>6493</u> reflections                          | $\Delta\rho_{\min} = \underline{-0.41} \text{ e } \text{Å}^{-3}$                 |
| <u>444</u> parameters                            | Extinction correction: <u>none</u>                                               |
| <u>1</u> restraint                               | Extinction coefficient: <u>-</u>                                                 |
| <u>0</u> constraints                             | Absolute structure: <u>Flack, Parsons</u> <sup>[9,10]</sup>                      |
| Primary atom site location: <u>iterative</u>     | Absolute structure parameter: <u>-0.034 (12)</u>                                 |
| Secondary atom site location: <u>difference</u>  |                                                                                  |
| Fourier map                                      |                                                                                  |

### Computational Methods

All calculations were obtained by the Gaussian<sup>®</sup>16 program.<sup>[11]</sup> The DFT functional B3LYP was used for all calculations, where two basis sets were considered. The carbon, hydrogen, oxygen, phosphorus, and silicon atoms were calculated with the basis set of 6-311++g\*. The metal centre Pd was calculated with the basis set LanL2DZ split valence. For this study, the obtained molecules were geometry optimized and afterwards a frequency calculation took place. For the calculation of absorption and CD spectra, the TD-SCF method was used, and 40 single-excited-states were calculated. All calculations were obtained at a FUJITSU CELSIUS Workstation with an Intel<sup>®</sup> Xeon<sup>®</sup> E-2136 CPU with 3.31 GHz and 64 GB RAM. The system runs on Windows 10 Pro for workstations. Geometry optimization and excited states can be found in Table S9-Table S14.

### Structural aspects of the DFT calculations

As already mentioned, the two structures origin from two distinct DFT optimizations. They converge in different minima of the energy hypersurface and, thus, are of different structural parameters. Table S7 compares zero-point energy, enthalpy, and Gibb's free energy of the two optimized structures. It becomes evident that both optimizations lead to indistinguishable local minima in the hypersurface from an energetic point of view. Figure S1 shows the two optimized geometries in a comparing manner. At first glance, structure A and structure B are very similar in geometry (Figure S1), in addition to their energetic properties (Table S7).

| Table S7. Energetic minima by DFT for two distinct geometry optimizations of [Pd(Me) <sub>2</sub> (BINAP)] |             |             |
|------------------------------------------------------------------------------------------------------------|-------------|-------------|
| Energetic property (kJ/mol)                                                                                | Structure A | Structure B |
| <b>Zero-point energy</b>                                                                                   | -2584.99    | -2584.99    |
| <b>Enthalpy</b>                                                                                            | -2584.94    | -2584.94    |
| <b>Gibbs' free energy</b>                                                                                  | -2585.07    | -2585.06    |

At a closer look, however, the phenyl groups located at the phosphorous atoms are oriented in a different manner, as seen most obviously in the right part of the representations (highlighted in the top part of Figure S1). Furthermore, it becomes clear from the side view of the complexes in the bottom part of Figure S1 that the atoms of the BINAP ligand are evenly distributed (non-evenly distributed) across the Pd-P-P plane for structure A (B), additionally witnessed by the dihedral angles around the coordination sphere, i.e. Pd centre, coordinating P, and C atoms of BINAP that bind to coordinating P. An additional view on the top of the molecule can be found in Figure S2. The close to square-planar coordination sphere of Pd is not impeded by this for both structures. To this end, small changes in the geometry then lead to variations in the electronic structure and thus modify all electronic transitions. Importantly, the calculated rotatory strengths are much more affected than the oscillator strengths.<sup>[12]</sup>

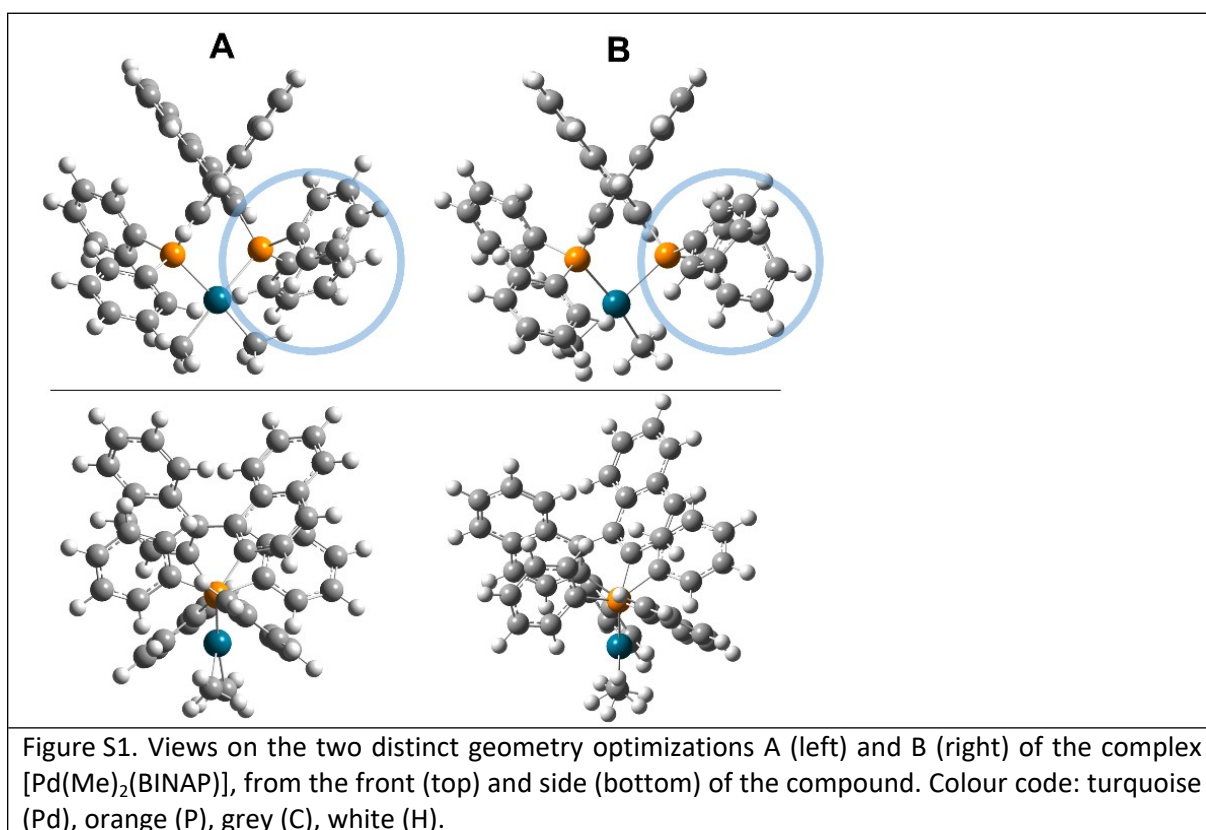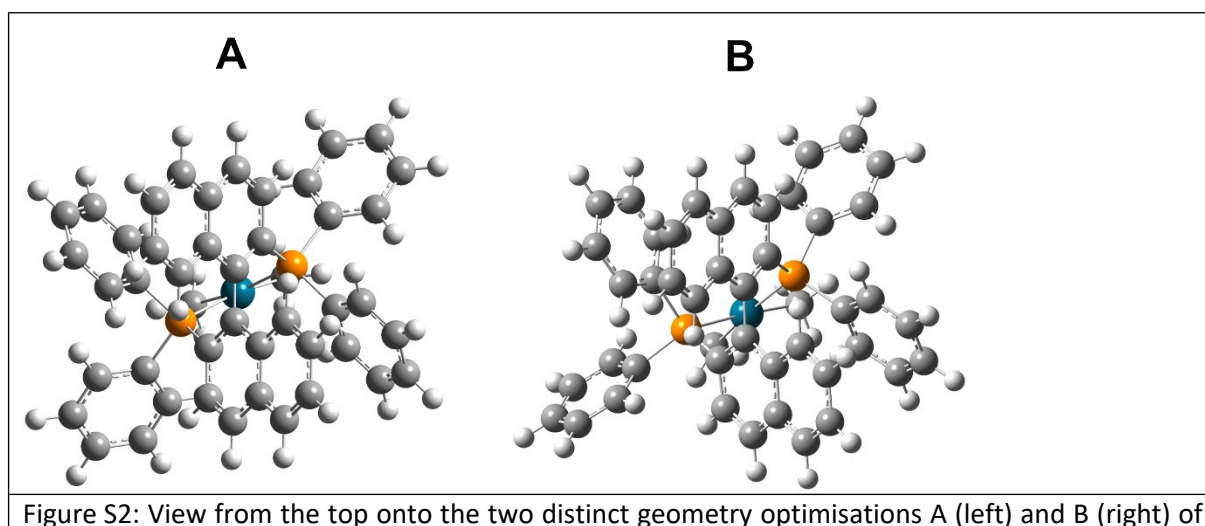

the complex [PdMe<sub>2</sub>BINAP].

### Occurrence of molecular orbitals

Table S8: Occurrence of molecular orbitals for calculated structures A (left) and B (right), full set

| MO number A | Occurrence A (%) | MO number B | Occurrence B (%) |
|-------------|------------------|-------------|------------------|
| 172         | 3.1              | 171         | 1.3              |
| 173         | 6.3              | 172         | 4.2              |
| 174         | 0.2              | 173         | 2.6              |
| 175         | 7.5              | 174         | 2.5              |
| 176         | 7.7              | 175         | 10.2             |
| 177         | 5.5              | 176         | 12.1             |
| 178         | 9.6              | 177         | 4.6              |
| 179         | 19.1             | 178         | 5.8              |
| 180         | 21.8             | 179         | 17.8             |
| 181         | 19.4             | 180         | 15.8             |
| 182         | 21.8             | 181         | 23.1             |
| 183         | 21.1             | 182         | 28.9             |
| 184         | 17.8             | 183         | 18.7             |
| 185         | 9.5              | 184         | 12.8             |
| 186         | 6.1              | 185         | 12.2             |
| 187         | 4.6              | 186         | 5.1              |
| 188         | 4.2              | 187         | 6.9              |
| 189         | 4.4              | 188         | 2.1              |
| 190         | 0.0              | 189         | 2.2              |
| 191         | 0.2              | 190         | 1.3              |
| 192         | 0.2              | 191         | 0.1              |
| 193         | 1.2              | 192         | 2.9              |
| 194         | 0.1              | 193         | 0.2              |
| 195         | 2.1              | 194         | 1.4              |
| 196         | 3.2              | 195         | 2.6              |
| 197         | 0.1              | 196         | 0.4              |
| 198         | 1.2              | 197         | 0.0              |
| 199         | 0.4              | 198         | 0.8              |
| 205         | 1.6              | 201         | 0.3              |
| 206         | 0.2              | 203         | 0.8              |
|             |                  | 205         | 0.3              |

### Occupied and unoccupied orbital representations of structure A and B

**A**

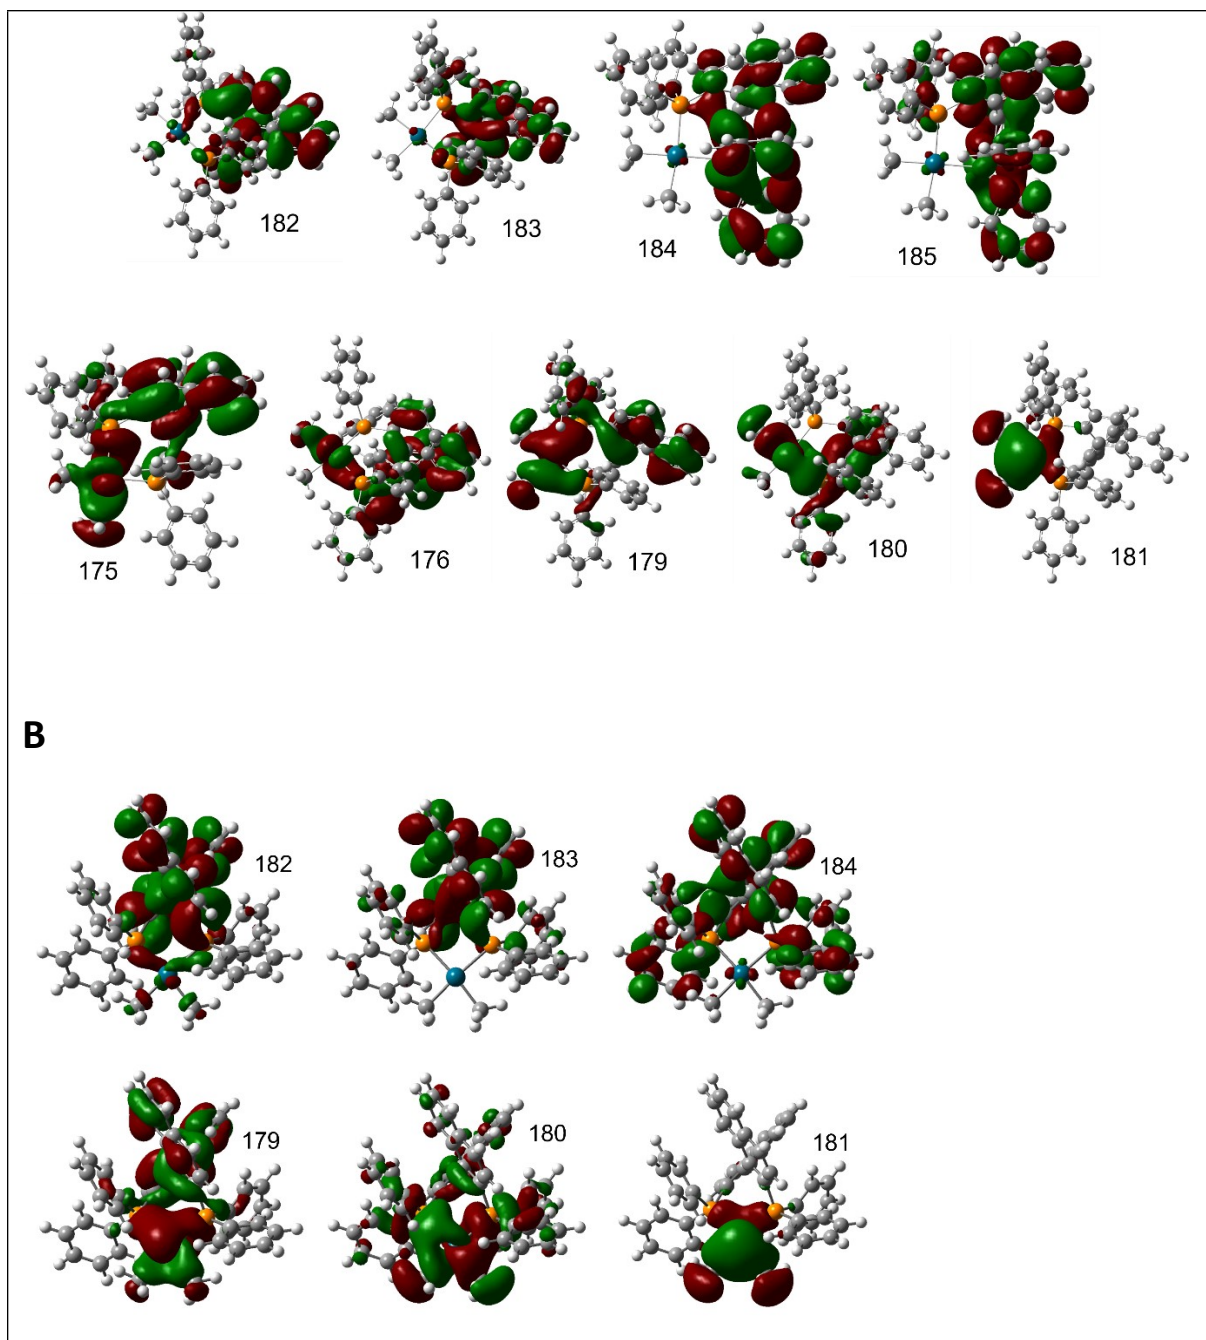

Figure S3: Unoccupied (top) and occupied (bottom) molecular orbital representations for the main contributions of selected CD-active electronic transitions of optimised structure A and B of the complex [PdMe<sub>2</sub>BINAP] (iso value 0.02). Colour code: turquoise (Pd), orange (P), grey (C), white (H).

Calculations for structure A

Table S9: Through DFT obtained zero-point energy (E), enthalpy (H) and Gibbs free energy (G) of structure A in kJ/mol

| E        | H        | G        |
|----------|----------|----------|
| -2584.99 | -2584.94 | -2585.07 |

Table S10: Through DFT obtained geometry of structure A

| Center | Atomic | Coordinates (Angstroms) |
|--------|--------|-------------------------|
|--------|--------|-------------------------|



| Number | Number | X         | Y         | Z         |
|--------|--------|-----------|-----------|-----------|
| 1      | 6      | -0.979817 | -4.675577 | -3.382094 |
| 2      | 6      | -0.030475 | -3.766416 | -3.777054 |
| 3      | 6      | 0.40497   | -2.738218 | -2.90036  |
| 4      | 6      | -0.153805 | -2.636473 | -1.588218 |
| 5      | 6      | -1.137394 | -3.597289 | -1.218541 |
| 6      | 6      | -1.536085 | -4.585787 | -2.086077 |
| 7      | 1      | 1.840083  | -1.886457 | -4.275887 |
| 8      | 1      | -1.30273  | -5.461299 | -4.057655 |
| 9      | 1      | 0.407496  | -3.822138 | -4.769489 |
| 10     | 6      | 1.398106  | -1.810211 | -3.286458 |
| 11     | 6      | 0.287782  | -1.594682 | -0.696287 |
| 12     | 1      | -1.579052 | -3.552494 | -0.231697 |
| 13     | 1      | -2.285487 | -5.305702 | -1.772022 |
| 14     | 6      | 1.26842   | -0.694629 | -1.118014 |
| 15     | 6      | 1.812523  | -0.828885 | -2.426564 |
| 16     | 1      | 2.581291  | -0.143179 | -2.754504 |
| 17     | 6      | -0.286893 | -1.595274 | 0.695121  |
| 18     | 6      | 0.156153  | -2.636816 | 1.586657  |
| 19     | 6      | -1.268688 | -0.696646 | 1.117269  |
| 20     | 6      | -0.40241  | -2.739843 | 2.898789  |
| 21     | 6      | -1.812529 | -0.832213 | 2.425802  |
| 22     | 6      | 1.540895  | -4.584614 | 2.083596  |
| 23     | 6      | 0.034395  | -3.767848 | 3.775027  |
| 24     | 6      | -1.396768 | -1.813321 | 3.285286  |
| 25     | 1      | -2.582233 | -0.147724 | 2.754077  |
| 26     | 6      | 0.984844  | -4.675653 | 3.37961   |
| 27     | 1      | 2.291188  | -5.303445 | 1.769187  |
| 28     | 1      | -0.403433 | -3.824531 | 4.767471  |
| 29     | 1      | -1.838621 | -1.890551 | 4.274694  |
| 30     | 1      | 1.308793  | -5.461253 | 4.054817  |
| 31     | 6      | 3.240233  | 1.453974  | -1.043133 |
| 32     | 6      | 4.56162   | 1.136796  | -0.70959  |
| 33     | 6      | 3.010743  | 2.325118  | -2.11798  |
| 34     | 6      | 5.625324  | 1.662826  | -1.443529 |
| 35     | 1      | 4.77305   | 0.488066  | 0.131387  |
| 36     | 6      | 4.071476  | 2.839725  | -2.858053 |

| Center | Atomic | Coordinates (Angstroms) |           |           |
|--------|--------|-------------------------|-----------|-----------|
| 37     | 1      | 1.994075                | 2.612677  | -2.363246 |
| 38     | 6      | 5.384158                | 2.509191  | -2.522806 |
| 39     | 1      | 6.644018                | 1.410635  | -1.165512 |
| 40     | 1      | 3.872658                | 3.512933  | -3.685976 |
| 41     | 1      | 6.212889                | 2.919248  | -3.09143  |
| 42     | 15     | 1.758416                | 0.814267  | -0.125218 |
| 43     | 6      | 2.478103                | 0.197116  | 1.455358  |
| 44     | 6      | 3.238402                | -0.974095 | 1.56028   |
| 45     | 6      | 2.291757                | 0.98975   | 2.595343  |
| 46     | 6      | 3.806048                | -1.341662 | 2.777931  |
| 47     | 1      | 3.383784                | -1.606236 | 0.691103  |
| 48     | 6      | 2.865028                | 0.624001  | 3.811873  |
| 49     | 1      | 1.696135                | 1.894036  | 2.523143  |
| 50     | 6      | 3.6235                  | -0.54137  | 3.90505   |
| 51     | 1      | 4.385121                | -2.256909 | 2.847713  |
| 52     | 1      | 2.714307                | 1.24818   | 4.687015  |
| 53     | 1      | 4.066773                | -0.828903 | 4.853294  |
| 54     | 15     | -1.760129               | 0.81312   | 0.126409  |
| 55     | 6      | -3.245834               | 1.447315  | 1.041958  |
| 56     | 6      | -4.565539               | 1.126866  | 0.704815  |
| 57     | 6      | -3.02141                | 2.317388  | 2.118738  |
| 58     | 6      | -5.63247                | 1.648592  | 1.437115  |
| 59     | 1      | -4.77316                | 0.478908  | -0.137696 |
| 60     | 6      | -4.085374               | 2.827737  | 2.857143  |
| 61     | 1      | -2.006174               | 2.60747   | 2.366867  |
| 62     | 6      | -5.396291               | 2.493925  | 2.518313  |
| 63     | 1      | -6.649772               | 1.39386   | 1.156328  |
| 64     | 1      | -3.890434               | 3.500207  | 3.686585  |
| 65     | 1      | -6.227538               | 2.900663  | 3.085648  |
| 66     | 6      | -2.474706               | 0.198536  | -1.457465 |
| 67     | 6      | -3.231662               | -0.974349 | -1.567595 |
| 68     | 6      | -2.288189               | 0.995214  | -2.594611 |
| 69     | 6      | -3.795742               | -1.339712 | -2.787563 |
| 70     | 1      | -3.37717                | -1.609548 | -0.700687 |
| 71     | 6      | -2.85797                | 0.631714  | -3.813452 |

| Center | Atomic | Coordinates (Angstroms) |           |           |
|--------|--------|-------------------------|-----------|-----------|
| 72     | 1      | -1.695219               | 1.900924  | -2.518401 |
| 73     | 6      | -3.613043               | -0.53544  | -3.91182  |
| 74     | 1      | -4.372136               | -2.25633  | -2.861367 |
| 75     | 1      | -2.707178               | 1.259038  | -4.68633  |
| 76     | 1      | -4.053561               | -0.82124  | -4.86187  |
| 77     | 6      | 1.140942                | -3.59622  | 1.216526  |
| 78     | 1      | 1.582426                | -3.550455 | 0.229654  |
| 79     | 46     | -0.001132               | 2.492559  | 0.00498   |
| 80     | 6      | -1.361555               | 4.092195  | -0.134667 |
| 81     | 1      | -1.42691                | 4.604403  | 0.828481  |
| 82     | 1      | -0.996428               | 4.803277  | -0.878243 |
| 83     | 1      | -2.361423               | 3.756782  | -0.419291 |
| 84     | 6      | 1.36073                 | 4.090362  | 0.152657  |
| 85     | 1      | 2.36021                 | 3.752834  | 0.436214  |
| 86     | 1      | 1.42703                 | 4.606452  | -0.808346 |
| 87     | 1      | 0.996092                | 4.798699  | 0.899079  |

Table S11: Calculated excited states of structure A, their crossings, rotatory strengths, energies in eV and nm, and their oscillator strength

| Excited State | Crossing                            | Rotary strength                 | Energy [eV] | Wavelength [nm] | Oscillator strength f |
|---------------|-------------------------------------|---------------------------------|-------------|-----------------|-----------------------|
| 1             | 181 → 182                           | 0.70176                         | 2.7716      | 447.34          | 0.0017                |
| 2             | 181 → 183                           | 0.70382                         | 2.9913      | 414.48          | 0.0003                |
| 3             | 179 → 182<br>180 → 182              | 0.63842<br>0.25397              | 3.4176      | 362.78          | 0.0115                |
| 4             | 179 → 182<br>180 → 182<br>181 → 184 | -0.25641<br>0.63246<br>-0.11077 | 3.4183      | 362.7           | 0.0295                |
| 5             | 180 → 182<br>181 → 184<br>181 → 186 | 0.10882<br>0.64691<br>0.23640   | 3.5261      | 351.62          | 0.0107                |
| 6             | 181 → 185                           | 0.69823                         | 3.538       | 350.44          | 0.0002                |
| 7             | 180 → 183                           | 0.69048                         | 3.6023      | 344.18          | 0.0152                |
| 8             | 178 → 182<br>179 → 183<br>181 → 186 | -0.25553<br>0.62709<br>-0.15707 | 3.6474      | 339.93          | 0.0033                |
| 9             | 179 → 183<br>181 → 184<br>181 → 186 | 0.13737<br>-0.23506<br>0.64166  | 3.6974      | 335.33          | 0.0041                |

| Excited State | Crossing                                                      | Rotary strength                                        | Energy [eV] | Wavelength [nm] | Oscillator strength f |
|---------------|---------------------------------------------------------------|--------------------------------------------------------|-------------|-----------------|-----------------------|
| <b>10</b>     | 177 → 182<br>181 → 187<br>181 → 189                           | -0.15711<br>0.65031<br>-0.19162                        | 3.7543      | 330.25          | 0.0041                |
| <b>11</b>     | 175 → 182<br>177 → 182<br>178 → 183<br>181 → 187              | 0.18398<br>0.63184<br>-0.10371<br>0.17372              | 3.7837      | 327.68          | 0.0089                |
| <b>12</b>     | 176 → 182<br>177 → 183<br>178 → 182<br>179 → 183<br>181 → 188 | -0.27932<br>-0.11608<br>0.54462<br>0.18944<br>-0.17760 | 3.8155      | 324.94          | 0.0265                |
| <b>13</b>     | 175 → 182<br>177 → 182<br>178 → 183<br>181 → 187<br>181 → 189 | 0.29105<br>-0.14434<br>0.12797<br>0.13479<br>0.55243   | 3.8666      | 320.66          | 0.0071                |
| <b>14</b>     | 178 → 182<br>181 → 188                                        | 0.15432<br>0.66745                                     | 3.8952      | 318.3           | 0.0145                |
| <b>15</b>     | 175 → 182<br>178 → 183<br>181 → 189                           | 0.43618<br>0.41521<br>-0.30850                         | 3.9655      | 312.66          | 0.0008                |
| <b>16</b>     | 176 → 182<br>177 → 183<br>178 → 182<br>179 → 183              | 0.57615<br>-0.27850<br>0.20032<br>0.13394              | 3.9698      | 312.32          | 0.0101                |
| <b>17</b>     | 181 → 190                                                     | 0.69468                                                | 3.9903      | 310.72          | 0.0015                |
| <b>18</b>     | 175 → 182<br>177 → 182<br>178 → 183<br>180 → 184<br>181 → 189 | -0.36101<br>0.15545<br>0.51727<br>0.13448<br>0.12348   | 4.0522      | 305.97          | 0.0526                |
| <b>19</b>     | 176 → 182<br>177 → 183<br>178 → 182<br>179 → 184              | 0.15584<br>0.60340<br>0.20102<br>-0.13515              | 4.0645      | 305.04          | 0.0004                |
| <b>20</b>     | 181 → 191<br>181 → 192                                        | 0.68084<br>0.13184                                     | 4.0936      | 302.87          | 0.0034                |
| <b>21</b>     | 176 → 183<br>179 → 185<br>180 → 184                           | 0.45339<br>0.12426<br>0.46226                          | 4.14        | 299.48          | 0.0158                |
| <b>22</b>     | 175 → 183<br>177 → 183<br>179 → 184<br>180 → 185              | 0.36574<br>0.13770<br>0.33958<br>0.42276               | 4.1534      | 298.51          | 0.0177                |

| Excited State | Crossing                                                                                | Rotary strength                                                             | Energy [eV] | Wavelength [nm] | Oscillator strength f |
|---------------|-----------------------------------------------------------------------------------------|-----------------------------------------------------------------------------|-------------|-----------------|-----------------------|
| <b>23</b>     | 175 → 183<br>179 → 184<br>179 → 186<br>180 → 185<br>181 → 192                           | -0.35173<br>-0.14456<br>0.16905<br>0.48675<br>0.18134                       | 4.1679      | 297.47          | 0                     |
| <b>24</b>     | 174 → 182<br>176 → 183<br>179 → 185<br>180 → 184<br>180 → 186<br>181 → 193              | 0.51450<br>-0.20748<br>0.10993<br>0.15649<br>0.12872<br>-0.30859            | 4.176       | 296.9           | 0.001                 |
| <b>25</b>     | 174 → 182<br>176 → 183<br>179 → 185<br>180 → 184<br>180 → 186<br>181 → 193              | 0.43203<br>0.29218<br>-0.15436<br>-0.14902<br>-0.18177<br>0.29528           | 4.1796      | 296.64          | 0.0029                |
| <b>26</b>     | 176 → 183<br>179 → 185<br>180 → 184<br>180 → 186<br>181 → 193                           | -0.26822<br>0.13011<br>0.31402<br>0.14458<br>0.50774                        | 4.1882      | 296.03          | 0.0146                |
| <b>27</b>     | 180 → 185<br>181 → 191<br>181 → 192<br>181 → 194                                        | -0.19427<br>-0.11277<br>0.60529<br>0.26711                                  | 4.2009      | 295.14          | 0.0004                |
| <b>28</b>     | 176 → 183<br>179 → 185<br>180 → 184                                                     | 0.13370<br>0.60788<br>-0.26685                                              | 4.2595      | 291.08          | 0.0282                |
| <b>29</b>     | 173 → 182<br>175 → 183<br>179 → 184<br>180 → 185                                        | -0.15629<br>-0.42312<br>0.47962<br>-0.11434                                 | 4.2803      | 289.66          | 0.0848                |
| <b>30</b>     | 176 → 183<br>179 → 185<br>180 → 184<br>180 → 186                                        | 0.16483<br>-0.20621<br>-0.13874<br>0.59440                                  | 4.3254      | 286.64          | 0.0545                |
| <b>31</b>     | 173 → 182<br>175 → 183<br>177 → 184<br>179 → 184<br>179 → 186<br>180 → 185<br>180 → 187 | 0.20888<br>0.17266<br>-0.17102<br>0.19146<br>0.52250<br>-0.14026<br>0.14628 | 4.3416      | 285.57          | 0.0001                |

| Excited State | Crossing  | Rotary strength | Energy [eV] | Wavelength [nm] | Oscillator strength f |
|---------------|-----------|-----------------|-------------|-----------------|-----------------------|
| <b>32</b>     | 172 → 182 | -0.22535        | 4.3611      | 284.3           | 0.0242                |
|               | 173 → 183 | -0.14947        |             |                 |                       |
|               | 176 → 183 | 0.16186         |             |                 |                       |
|               | 178 → 184 | 0.16125         |             |                 |                       |
|               | 179 → 187 | 0.33353         |             |                 |                       |
|               | 179 → 189 | 0.20842         |             |                 |                       |
|               | 180 → 184 | 0.13097         |             |                 |                       |
|               | 180 → 186 | -0.18932        |             |                 |                       |
|               | 181 → 196 | 0.15801         |             |                 |                       |
|               | 181 → 198 | 0.12841         |             |                 |                       |
|               | 181 → 205 | 0.11575         |             |                 |                       |
|               | <b>33</b> | 179 → 184       |             |                 |                       |
| 179 → 186     |           | -0.21696        |             |                 |                       |
| 180 → 187     |           | 0.61867         |             |                 |                       |
| 181 → 194     |           | -0.14024        |             |                 |                       |
| <b>34</b>     | 180 → 187 | 0.14524         | 4.4112      | 281.07          | 0.0016                |
|               | 181 → 192 | -0.24503        |             |                 |                       |
|               | 181 → 194 | 0.59785         |             |                 |                       |
|               | 181 → 197 | 0.18741         |             |                 |                       |
| <b>35</b>     | 179 → 187 | -0.30104        | 4.4178      | 280.64          | 0.0038                |
|               | 179 → 189 | 0.15025         |             |                 |                       |
|               | 181 → 195 | 0.20754         |             |                 |                       |
|               | 181 → 196 | 0.39885         |             |                 |                       |
|               | 181 → 198 | 0.25208         |             |                 |                       |
|               | 181 → 205 | 0.11460         |             |                 |                       |
|               | 181 → 206 | 0.13708         |             |                 |                       |
| <b>36</b>     | 179 → 187 | 0.24105         | 4.4564      | 278.22          | 0.0093                |
|               | 179 → 189 | -0.24127        |             |                 |                       |
|               | 180 → 188 | -0.15534        |             |                 |                       |
|               | 181 → 193 | -0.10813        |             |                 |                       |
|               | 181 → 195 | 0.42792         |             |                 |                       |
|               | 181 → 196 | 0.14850         |             |                 |                       |
|               | 181 → 199 | -0.22733        |             |                 |                       |
|               | 181 → 205 | -0.18285        |             |                 |                       |
| <b>37</b>     | 172 → 183 | 0.11492         | 4.4796      | 276.78          | 0.0002                |
|               | 173 → 182 | 0.31778         |             |                 |                       |
|               | 177 → 184 | -0.20913        |             |                 |                       |
|               | 178 → 187 | -0.15654        |             |                 |                       |
|               | 179 → 184 | 0.12141         |             |                 |                       |
|               | 179 → 186 | -0.30194        |             |                 |                       |
|               | 179 → 188 | 0.17805         |             |                 |                       |
|               | 180 → 189 | 0.30206         |             |                 |                       |
| <b>38</b>     | 174 → 183 | 0.69            | 4.5023      | 275.38          | 0.0005                |

| Excited State | Crossing  | Rotary strength | Energy [eV] | Wavelength [nm] | Oscillator strength f |
|---------------|-----------|-----------------|-------------|-----------------|-----------------------|
| 39            | 172 → 182 | -0.13798        | 4.5228      | 274.13          | 0.0354                |
|               | 173 → 183 | -0.11421        |             |                 |                       |
|               | 178 → 184 | 0.24166         |             |                 |                       |
|               | 179 → 187 | -0.24380        |             |                 |                       |
|               | 180 → 188 | 0.43863         |             |                 |                       |
|               | 181 → 195 | 0.22131         |             |                 |                       |
|               | 181 → 196 | -0.14507        |             |                 |                       |
| 40            | 172 → 182 | 0.10961         | 4.5480      | 272.61          | 0.0106                |
|               | 178 → 184 | -0.25295        |             |                 |                       |
|               | 178 → 186 | 0.12321         |             |                 |                       |
|               | 179 → 187 | 0.32911         |             |                 |                       |
|               | 180 → 188 | 0.48808         |             |                 |                       |

### Calculations for structure B

Table S12: Through DFT obtained zero-point energy (E), enthalpy (H) and Gibbs free energy (G) of structure B in kJ/mol

| E        | H        | G        |
|----------|----------|----------|
| -2584.99 | -2584.94 | -2585.06 |

Table S13: Through DFT obtained geometry of structure B

| Center Number | Atomic Number | Coordinates (Angstroms) |           |           |
|---------------|---------------|-------------------------|-----------|-----------|
|               |               | X                       | Y         | Z         |
| 1             | 6             | 2.90052                 | 1.767532  | 1.116753  |
| 2             | 6             | 4.24766                 | 1.42724   | 1.284403  |
| 3             | 6             | 2.417965                | 2.925823  | 1.740723  |
| 4             | 6             | 5.085065                | 2.214429  | 2.074761  |
| 5             | 1             | 4.655978                | 0.553943  | 0.790289  |
| 6             | 6             | 3.250773                | 3.705973  | 2.538793  |
| 7             | 1             | -3.373393               | 3.162858  | -0.948103 |
| 8             | 6             | 4.587983                | 3.350401  | 2.710071  |
| 9             | 1             | 6.129229                | 1.939778  | 2.188198  |
| 10            | 1             | 2.859506                | 4.601268  | 3.01161   |
| 11            | 1             | 5.241664                | 3.963225  | 3.322752  |
| 12            | 15            | 1.700506                | 0.791221  | 0.091911  |
| 13            | 6             | 2.786816                | -0.177871 | -1.044328 |
| 14            | 6             | 2.894641                | 0.243728  | -2.375258 |
| 15            | 6             | 3.530777                | -1.287331 | -0.621488 |

| Center Number | Atomic Number | Coordinates (Angstroms) |           |           |
|---------------|---------------|-------------------------|-----------|-----------|
|               |               | X                       | Y         | Z         |
| 16            | 6             | 3.745154                | -0.419017 | -3.258559 |
| 17            | 1             | 2.309096                | 1.090507  | -2.714152 |
| 18            | 6             | 4.37877                 | -1.949204 | -1.506185 |
| 19            | 1             | 3.441758                | -1.644412 | 0.399094  |
| 20            | 6             | 4.49096                 | -1.513467 | -2.825838 |
| 21            | 1             | 3.819832                | -0.080557 | -4.287174 |
| 22            | 1             | 4.945558                | -2.810459 | -1.16666  |
| 23            | 1             | 5.151149                | -2.030616 | -3.515116 |
| 24            | 15            | -1.737302               | 0.845411  | -0.497125 |
| 25            | 6             | -2.221132               | 0.677611  | 1.283973  |
| 26            | 6             | -1.734664               | 1.633536  | 2.181621  |
| 27            | 6             | -3.159964               | -0.258332 | 1.736636  |
| 28            | 6             | -2.169626               | 1.650965  | 3.506825  |
| 29            | 1             | -1.021068               | 2.37344   | 1.834556  |
| 30            | 6             | -3.58835                | -0.246606 | 3.060029  |
| 31            | 1             | -3.566897               | -0.997092 | 1.055623  |
| 32            | 6             | -3.096297               | 0.710623  | 3.948375  |
| 33            | 1             | -1.785008               | 2.401715  | 4.190049  |
| 34            | 1             | -4.310497               | -0.982941 | 3.397991  |
| 35            | 1             | -3.438578               | 0.723564  | 4.978455  |
| 36            | 6             | -3.441966               | 1.024832  | -1.210358 |
| 37            | 6             | -4.252623               | -0.050227 | -1.600357 |
| 38            | 6             | -3.980608               | 2.317481  | -1.247332 |
| 39            | 6             | -5.561939               | 0.16471   | -2.02583  |
| 40            | 1             | -3.866256               | -1.062804 | -1.580017 |
| 41            | 6             | -5.292686               | 2.530613  | -1.666205 |
| 42            | 1             | 1.390294                | 3.231513  | 1.574467  |
| 43            | 6             | -6.086434               | 1.455888  | -2.060075 |
| 44            | 1             | -6.173485               | -0.680148 | -2.327625 |
| 45            | 1             | -5.690037               | 3.54036   | -1.690036 |
| 46            | 1             | -7.106472               | 1.621982  | -2.391859 |
| 47            | 6             | 1.059871                | -0.483897 | 1.304742  |
| 48            | 6             | 0.123844                | -1.450768 | 0.932653  |
| 49            | 6             | 1.454182                | -0.390665 | 2.667947  |
| 50            | 6             | -0.437588               | -2.3209   | 1.927879  |



| Center Number | Atomic Number | Coordinates (Angstroms) |           |           |
|---------------|---------------|-------------------------|-----------|-----------|
|               |               | X                       | Y         | Z         |
| 51            | 6             | 0.938966                | -1.223952 | 3.625675  |
| 52            | 1             | 2.182066                | 0.354332  | 2.960307  |
| 53            | 6             | -0.023361               | -2.203976 | 3.291338  |
| 54            | 1             | 1.265696                | -1.132352 | 4.657657  |
| 55            | 6             | -0.279406               | -1.65145  | -0.501363 |
| 56            | 6             | -1.131677               | -0.775988 | -1.167894 |
| 57            | 6             | 0.249736                | -2.797403 | -1.198729 |
| 58            | 6             | -1.389023               | -0.973288 | -2.557387 |
| 59            | 6             | -0.072601               | -3.002371 | -2.576672 |
| 60            | 6             | -0.884918               | -2.047741 | -3.235232 |
| 61            | 1             | -1.995861               | -0.252755 | -3.091976 |
| 62            | 1             | -1.103812               | -2.176237 | -4.29137  |
| 63            | 6             | -0.584498               | -3.062735 | 4.272507  |
| 64            | 1             | -0.25597                | -2.959944 | 5.302728  |
| 65            | 6             | -1.417985               | -3.303909 | 1.615521  |
| 66            | 1             | -1.752433               | -3.410768 | 0.591193  |
| 67            | 6             | -1.946624               | -4.119131 | 2.587666  |
| 68            | 1             | -2.692898               | -4.860957 | 2.32094   |
| 69            | 6             | -1.525722               | -4.002578 | 3.932311  |
| 70            | 1             | -1.948327               | -4.654821 | 4.689965  |
| 71            | 6             | 1.08937                 | -3.758094 | -0.570338 |
| 72            | 1             | 1.360072                | -3.628529 | 0.469228  |
| 73            | 6             | 0.432048                | -4.139651 | -3.257602 |
| 74            | 1             | 0.174991                | -4.27495  | -4.304261 |
| 75            | 6             | 1.227159                | -5.05455  | -2.611593 |
| 76            | 1             | 1.604131                | -5.924297 | -3.14016  |
| 77            | 6             | 1.557842                | -4.855882 | -1.253385 |
| 78            | 1             | 2.190894                | -5.575421 | -0.743562 |
| 79            | 46            | 0.130737                | 2.313882  | -1.050692 |
| 80            | 6             | -0.98274                | 3.716124  | -2.14087  |
| 81            | 1             | -0.357033               | 4.296763  | -2.817473 |
| 82            | 1             | -1.759749               | 3.211116  | -2.719629 |
| 83            | 1             | -1.453771               | 4.4026    | -1.428821 |
| 84            | 6             | 1.725066                | 3.554173  | -1.644322 |
| 85            | 1             | 1.794419                | 3.562361  | -2.734965 |

| Center Number | Atomic Number | Coordinates (Angstroms) |          |           |
|---------------|---------------|-------------------------|----------|-----------|
|               |               | X                       | Y        | Z         |
| 86            | 1             | 1.510516                | 4.571241 | -1.307747 |
| 87            | 1             | 2.686318                | 3.245256 | -1.228369 |

Table S14: Calculated excited states of structure B, their crossings, rotatory strengths, energies in eV and nm, and their oscillator strength

| Excited State | Crossing                                                                                             | Rotary strength                                                                             | Energy [eV] | Wavelength [nm] | Oscillator strength f |
|---------------|------------------------------------------------------------------------------------------------------|---------------------------------------------------------------------------------------------|-------------|-----------------|-----------------------|
| 1             | 181 → 182                                                                                            | 0.69589                                                                                     | 2.797       | 443.28          | 0.0047                |
| 2             | 181 → 183                                                                                            | 0.69685                                                                                     | 3.0474      | 406.85          | 0.0012                |
| 3             | 179 → 182<br>180 → 182                                                                               | -0.23818<br>0.64914                                                                         | 3.438       | 360.63          | 0.0105                |
| 4             | 181 → 184                                                                                            | 0.68646                                                                                     | 3.4531      | 359.05          | 0.0008                |
| 5             | 179 → 182<br>181 → 185<br>181 → 186                                                                  | 0.29924<br>0.42322<br>0.45688                                                               | 3.5293      | 351.3           | 0.0027                |
| 6             | 179 → 182<br>180 → 182<br>180 → 183<br>181 → 185<br>181 → 186                                        | -0.45411<br>-0.18169<br>-0.10290<br>-0.12496<br>0.46691                                     | 3.5516      | 349.1           | 0.0177                |
| 7             | 179 → 182<br>180 → 182<br>180 → 183<br>181 → 184<br>181 → 185<br>181 → 186                           | -0.28818<br>-0.13474<br>-0.13539<br>0.12675<br>0.53001<br>-0.24269                          | 3.5749      | 346.82          | 0.0233                |
| 8             | 176 → 182<br>178 → 182<br>179 → 182<br>180 → 183<br>181 → 187                                        | 0.22846<br>0.10984<br>-0.14518<br>0.59590<br>-0.10534                                       | 3.7214      | 333.17          | 0.0422                |
| 9             | 177 → 182<br>178 → 182<br>179 → 183<br>180 → 183                                                     | 0.11816<br>-0.17108<br>0.64439<br>0.10828                                                   | 3.7564      | 330.06          | 0.009                 |
| 10            | 177 → 182<br>177 → 183<br>178 → 182<br>179 → 182<br>179 → 183<br>180 → 183<br>181 → 187<br>181 → 188 | 0.47791<br>-0.10294<br>-0.20288<br>-0.10266<br>-0.15052<br>-0.10020<br>-0.26874<br>-0.21735 | 3.8115      | 325.29          | 0.0013                |

| Excited State | Crossing                                                                                             | Rotary strength                                                                            | Energy [eV] | Wavelength [nm] | Oscillator strength f |
|---------------|------------------------------------------------------------------------------------------------------|--------------------------------------------------------------------------------------------|-------------|-----------------|-----------------------|
| <b>11</b>     | 176 → 182<br>177 → 182<br>178 → 182<br>181 → 188                                                     | -0.20448<br>0.23790<br>0.54082<br>-0.23172                                                 | 3.819       | 324.65          | 0.0041                |
| <b>12</b>     | 176 → 182<br>178 → 182<br>181 → 187<br>181 → 188                                                     | 0.13178<br>-0.19310<br>0.54183<br>-0.35083                                                 | 3.8244      | 324.2           | 0.0069                |
| <b>13</b>     | 175 → 182<br>177 → 182<br>181 → 187<br>181 → 188<br>181 → 189                                        | -0.16438<br>0.37444<br>0.28150<br>0.43785<br>0.11467                                       | 3.8456      | 322.41          | 0.0038                |
| <b>14</b>     | 175 → 182<br>176 → 182<br>178 → 182<br>180 → 183<br>181 → 189                                        | 0.33018<br>0.50939<br>0.15238<br>-0.23456<br>0.10419                                       | 3.9426      | 314.48          | 0.0157                |
| <b>15</b>     | 175 → 182<br>176 → 182<br>181 → 188<br>181 → 189                                                     | 0.17527<br>-0.19611<br>-0.14121<br>0.60253                                                 | 3.9729      | 312.07          | 0.0035                |
| <b>16</b>     | 175 → 182<br>175 → 183<br>176 → 182<br>178 → 182<br>179 → 183<br>181 → 188<br>181 → 189<br>181 → 190 | 0.46709<br>-0.10954<br>-0.23153<br>-0.16011<br>-0.12117<br>0.15268<br>-0.22401<br>-0.18452 | 3.9908      | 310.67          | 0.0187                |
| <b>17</b>     | 175 → 182<br>181 → 188<br>181 → 189<br>181 → 190                                                     | 0.11615<br>-0.10032<br>-0.18238<br>0.61959                                                 | 4.0618      | 305.24          | 0.0111                |
| <b>18</b>     | 176 → 183<br>177 → 183<br>178 → 182<br>178 → 183<br>180 → 185                                        | -0.16066<br>-0.19518<br>0.10354<br>0.58336<br>0.15207                                      | 4.0949      | 302.78          | 0.0023                |
| <b>19</b>     | 177 → 183<br>178 → 183<br>180 → 184<br>180 → 185                                                     | 0.47249<br>0.25516<br>-0.33232<br>-0.19394                                                 | 4.1002      | 302.39          | 0.0027                |

| Excited State | Crossing                                                                                | Rotary strength                                                              | Energy [eV] | Wavelength [nm] | Oscillator strength f |
|---------------|-----------------------------------------------------------------------------------------|------------------------------------------------------------------------------|-------------|-----------------|-----------------------|
| <b>20</b>     | 176 → 183<br>178 → 183<br>180 → 184<br>180 → 185<br>180 → 187                           | 0.33291<br>0.21537<br>0.43693<br>-0.30357<br>-0.10273                        | 4.1177      | 301.1           | 0.0139                |
| <b>21</b>     | 175 → 183<br>176 → 183<br>177 → 183<br>180 → 184<br>180 → 185                           | -0.11278<br>-0.30516<br>0.42197<br>0.38595<br>0.14614                        | 4.12        | 300.93          | 0.0061                |
| <b>22</b>     | 181 → 191                                                                               | 0.67244                                                                      | 4.1302      | 300.19          | 0.0006                |
| <b>23</b>     | 172 → 182<br>175 → 183<br>176 → 183<br>177 → 183<br>179 → 184<br>179 → 185<br>180 → 185 | 0.13714<br>0.41145<br>-0.27547<br>-0.13041<br>0.25826<br>0.19213<br>-0.12319 | 4.1529      | 298.54          | 0.0224                |
| <b>24</b>     | 176 → 183<br>181 → 190<br>181 → 191<br>181 → 192<br>181 → 193                           | 0.11524<br>-0.15320<br>-0.12003<br>0.53580<br>0.30831                        | 4.1868      | 296.13          | 0.0025                |
| <b>25</b>     | 174 → 182<br>175 → 182<br>175 → 183<br>176 → 183<br>179 → 184<br>181 → 192              | 0.13582<br>-0.14835<br>-0.22217<br>0.12954<br>0.56834<br>-0.13129            | 4.2302      | 293.09          | 0.0396                |
| <b>26</b>     | 174 → 182<br>174 → 183<br>175 → 183                                                     | 0.62394<br>-0.11208<br>0.23233                                               | 4.2398      | 292.43          | 0.008                 |
| <b>27</b>     | 172 → 182<br>174 → 182<br>175 → 183<br>176 → 183<br>179 → 185<br>179 → 186<br>180 → 185 | -0.16528<br>-0.14606<br>0.21480<br>0.11740<br>-0.23059<br>0.48784<br>0.14924 | 4.2824      | 289.52          | 0.0055                |
| <b>28</b>     | 172 → 182<br>175 → 183<br>179 → 184<br>179 → 185<br>179 → 186                           | 0.14270<br>-0.21305<br>-0.13844<br>0.42743<br>0.40686                        | 4.2891      | 289.07          | 0.0278                |

| Excited State | Crossing  | Rotary strength | Energy [eV] | Wavelength [nm] | Oscillator strength f |         |        |        |        |
|---------------|-----------|-----------------|-------------|-----------------|-----------------------|---------|--------|--------|--------|
| <b>29</b>     | 175 → 183 | 0.17750         | 4.2985      | 288.44          | 0.059                 |         |        |        |        |
|               | 176 → 183 | 0.23640         |             |                 |                       |         |        |        |        |
|               | 179 → 185 | 0.10833         |             |                 |                       |         |        |        |        |
|               | 179 → 186 | -0.20823        |             |                 |                       |         |        |        |        |
|               | 180 → 185 | 0.37771         |             |                 |                       |         |        |        |        |
|               | 181 → 192 | -0.12095        |             |                 |                       |         |        |        |        |
|               | 181 → 194 | 0.30968         |             |                 |                       |         |        |        |        |
| <b>30</b>     | 176 → 183 | -0.13536        | 4.3092      | 287.72          | 0.0218                |         |        |        |        |
|               | 179 → 185 | -0.10915        |             |                 |                       |         |        |        |        |
|               | 179 → 186 | 0.10942         |             |                 |                       |         |        |        |        |
|               | 180 → 185 | -0.19782        |             |                 |                       |         |        |        |        |
|               | 181 → 194 | 0.61055         |             |                 |                       |         |        |        |        |
| <b>31</b>     | 180 → 185 | 0.19025         | 4.3203      | 286.98          | 0.0124                |         |        |        |        |
|               | 180 → 186 | 0.53456         |             |                 |                       |         |        |        |        |
|               | 180 → 187 | -0.13808        |             |                 |                       |         |        |        |        |
|               | 181 → 192 | 0.12143         |             |                 |                       |         |        |        |        |
|               | 181 → 195 | 0.11496         |             |                 |                       |         |        |        |        |
|               | 181 → 198 | 0.13021         |             |                 |                       |         |        |        |        |
|               | 181 → 203 | -0.11856        |             |                 |                       |         |        |        |        |
| <b>32</b>     | 179 → 185 | -0.10021        | 4.3359      | 285.95          | 0.0064                |         |        |        |        |
|               | 180 → 185 | -0.11575        |             |                 |                       |         |        |        |        |
|               | 180 → 186 | 0.39821         |             |                 |                       |         |        |        |        |
|               | 180 → 187 | 0.13168         |             |                 |                       |         |        |        |        |
|               | 181 → 192 | -0.15876        |             |                 |                       |         |        |        |        |
|               | 181 → 194 | -0.11443        |             |                 |                       |         |        |        |        |
|               | 181 → 195 | -0.20539        |             |                 |                       |         |        |        |        |
|               | 181 → 196 | 0.12084         |             |                 |                       |         |        |        |        |
|               | 181 → 198 | -0.20294        |             |                 |                       |         |        |        |        |
|               | 181 → 201 | -0.14753        |             |                 |                       |         |        |        |        |
|               | 181 → 203 | 0.18010         |             |                 |                       |         |        |        |        |
|               | 181 → 205 | 0.10439         |             |                 |                       |         |        |        |        |
|               | <b>33</b> | 172 → 182       |             |                 |                       | 0.19071 | 4.3946 | 282.13 | 0.0188 |
|               |           | 173 → 182       |             |                 |                       | 0.44281 |        |        |        |
| 175 → 184     |           | -0.11647        |             |                 |                       |         |        |        |        |
| 177 → 184     |           | -0.11557        |             |                 |                       |         |        |        |        |
| 179 → 184     |           | -0.11885        |             |                 |                       |         |        |        |        |
| 179 → 185     |           | -0.28610        |             |                 |                       |         |        |        |        |
| 179 → 187     |           | -0.12830        |             |                 |                       |         |        |        |        |
| <b>34</b>     | 173 → 182 | 0.10222         | 4.411       | 281.08          | 0.0019                |         |        |        |        |
|               | 181 → 192 | -0.30463        |             |                 |                       |         |        |        |        |
|               | 181 → 193 | 0.56601         |             |                 |                       |         |        |        |        |
|               | 181 → 196 | -0.13314        |             |                 |                       |         |        |        |        |
|               | 181 → 197 | 0.15769         |             |                 |                       |         |        |        |        |

| Excited State | Crossing                                                                                             | Rotary strength                                                                          | Energy [eV] | Wavelength [nm] | Oscillator strength f |
|---------------|------------------------------------------------------------------------------------------------------|------------------------------------------------------------------------------------------|-------------|-----------------|-----------------------|
| <b>35</b>     | 172 → 182<br>173 → 182<br>178 → 184<br>179 → 185<br>179 → 187                                        | -0.25878<br>0.47961<br>-0.21126<br>0.19002<br>0.14281                                    | 4.4544      | 278.34          | 0.0109                |
| <b>36</b>     | 171 → 182<br>173 → 182<br>176 → 183<br>176 → 185<br>177 → 184<br>178 → 184<br>180 → 187<br>181 → 195 | -0.14989<br>-0.16713<br>0.10088<br>0.10605<br>-0.18581<br>-0.30963<br>0.33983<br>0.12210 | 4.4643      | 277.72          | 0.0294                |
| <b>37</b>     | 172 → 182<br>176 → 184<br>177 → 184<br>178 → 184<br>180 → 187<br>181 → 195                           | -0.13499<br>-0.17858<br>0.24794<br>0.44039<br>0.23057<br>0.15151                         | 4.4879      | 276.27          | 0.0141                |
| <b>38</b>     | 178 → 184<br>181 → 193<br>181 → 195<br>181 → 196                                                     | -0.10631<br>0.10395<br>0.31472<br>0.54491                                                | 4.5079      | 275.04          | 0.001                 |
| <b>39</b>     | 175 → 184<br>176 → 184<br>177 → 184<br>178 → 184<br>179 → 187                                        | -0.15446<br>0.11688<br>0.53654<br>-0.23787<br>-0.10221                                   | 4.5166      | 274.51          | 0.0001                |
| <b>40</b>     | 174 → 182<br>174 → 183<br>179 → 187                                                                  | 0.13035<br>0.63671<br>-0.16811                                                           | 4.5535      | 272.28          | 0.0059                |

## References

- [1] Y. Kiso, K. Yamamoto, K. Tamao, M. Kumada, *J. Am. Chem. Soc.* **1972**, *94*, 4373.
- [2] S. Yamamoto, H. Matsui, T. Okajima, S. Karuppuchamy, M. Yoshihara, *Solid State Commun.* **2008**, *148*, 274.
- [3] *APEX suite of crystallographic software, APEX 2, Version 2008.4, and APEX 3, Version 20019-1.0*, Bruker AXS Inc., Madison, Wisconsin, USA, **2009/2009**.
- [4] *SAINT, Version 8.40A, and SADABS, Version 2016/2*, Bruker AXS Inc., Madison, Wisconsin, USA, **206/2019**.
- [5] G. M. Sheldrick, *Acta Crystallogr., Sect. A: Found. Adv.* **2015**, *71*, 3.

- [6] a) G. M. Sheldrick, *Acta Crystallogr., Sect. C: Struct. Chem.* **2015**, *71*, 3; b) C. B. Hübschle, G. M. Sheldrick, B. Dittrich, *J. Appl. Crystallogr.* **2011**, *44*, 1281.
- [7] E. Prince, H. Fuess, T. Hahn, H. Wondratschek, U. Müller, U. Shmueli, A. Authier, V. Kopský, D. B. Litvin, M. G. Rossmann et al., *International tables for crystallography*, Springer Netherlands, Amsterdam, **2006**.
- [8] A. L. Spek, *Acta Crystallogr., Sect. D: Biol. Crystallogr.* **2009**, *65*, 148.
- [9] H. D. Flack, *Acta Crystallogr., Sect. A: Found. Crystallogr.* **1983**, *39*, 876.
- [10] S. Parsons, H. D. Flack, T. Wagner, *Acta Crystallogr., Sect. B: Struct. Sci., Cryst. Eng. Mater.* **2013**, *69*, 249.
- [11] M. J. Frisch, G. W. Trucks, H. B. Schlegel, G. E. Scuseria, M. A. Robb, J. R. Cheeseman, G. Scalmani, V. Barone, G. A. Petersson, H. Nakatsuji et al., *Gaussian 16 Rev. C.01*, Wallingford, CT, **2016**.
- [12] F. Santoro, F. Mortaheb, J. Lepelmeier, U. Boesl, U. Heiz, A. Kartouzian, *ChemPhysChem* **2018**, *19*, 715.
